# Supplementary material for: Advances in genotyping microsatellite markers through sequencing and consequences of scoring methods for Ceratonia siliqua (Leguminosae)
Source: PubMed Central journal article supplement — Appl Plant Sci. 2018 Dec 11;6(12):e01201. doi: 10.1002/aps3.1201 (PMC6303155; doi:10.1002/aps3.1201), 2018-12-11

**Appendix S3.** Frequencies of the selected alleles in homozygous and heterozygous loci according to the true allele index (TAI), see Materials and Methods.

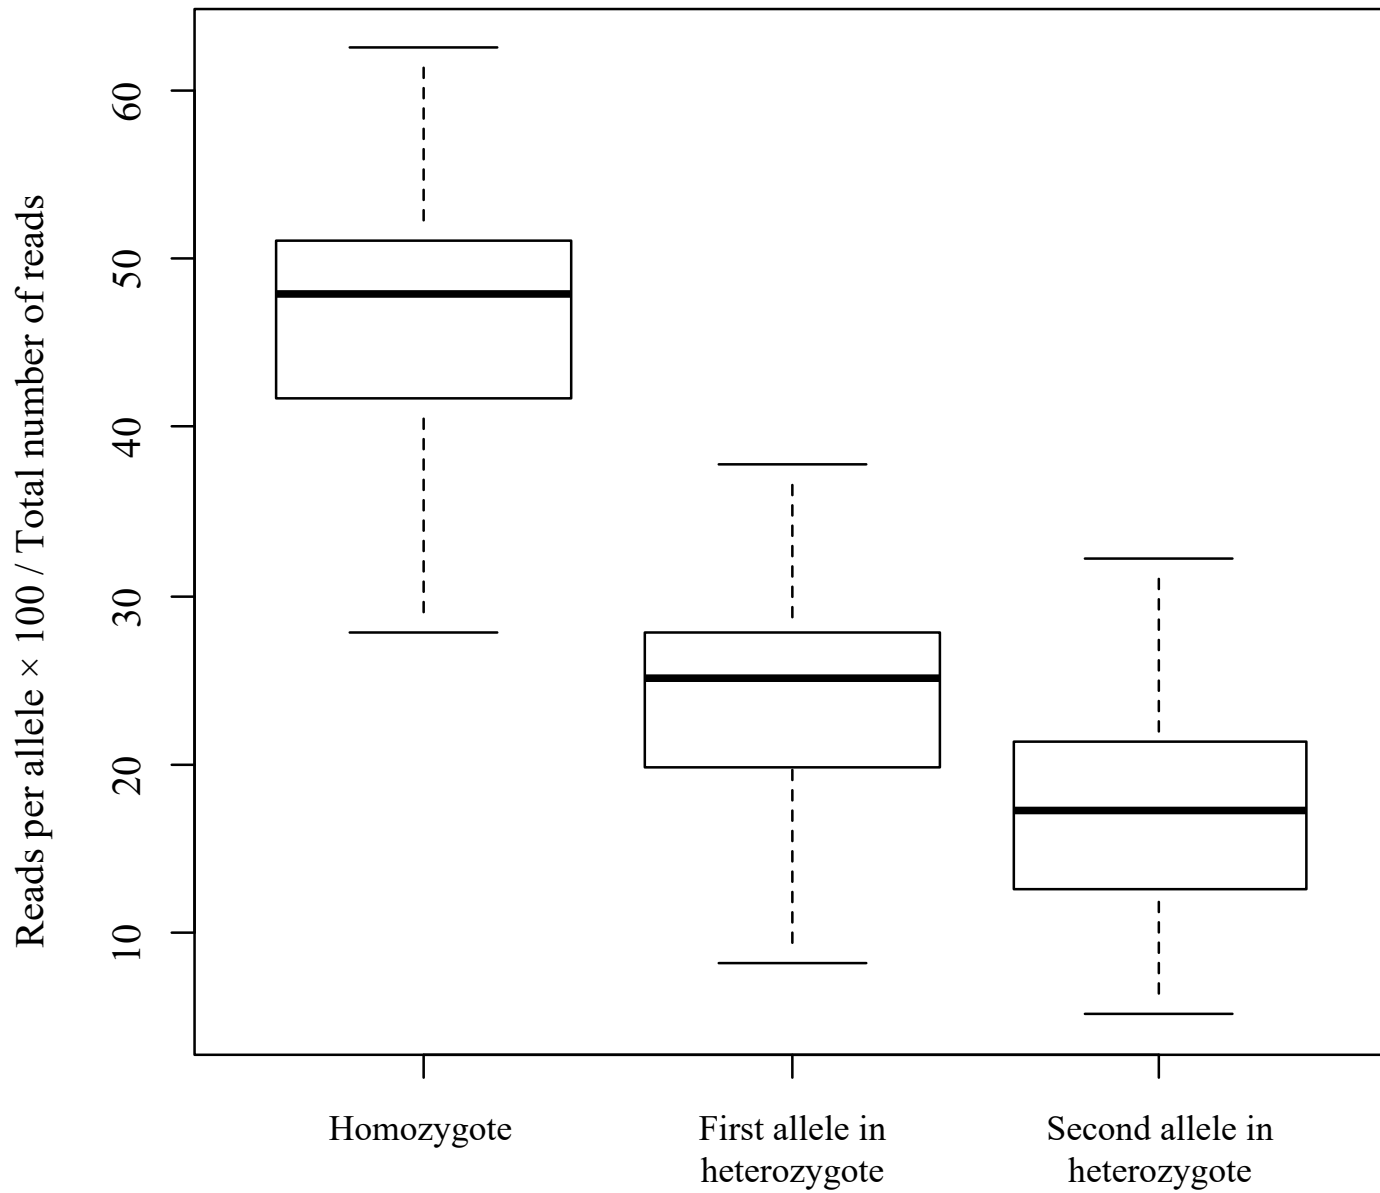

Supplement: APS3-6-e01201-s003.pdf [file APS3-6-e01201-s003.pdf]
